# Supplementary material for: Quality evaluation and future priorities for delivering acute myocardial infarction care in Sri Lanka
Source: PubMed Central journal article supplement — Heart. 2019 Dec 16;106(8):603–8. doi: 10.1136/heartjnl-2019-315396 (PMC7146937; doi:10.1136/heartjnl-2019-315396), 2019-12-16
Supplement: heartjnl-2019-315396supp001.pdf [file heartjnl-2019-315396supp001.pdf]

**Supplementary table 1: Comorbidities, risk factors and on admission events**

| <b>1. Characteristics</b><br><i>N (%)</i>    | <b>2. N</b> | <b>3. AMI 934</b> | <b>4. STEMI</b><br><b>844(90.36)</b> | <b>5. Non</b><br><b>STEMI</b><br><b>90(9.64)</b> |
|----------------------------------------------|-------------|-------------------|--------------------------------------|--------------------------------------------------|
| <b><i>Comorbidities and risk factors</i></b> | 863         |                   |                                      |                                                  |
| Angina                                       |             | 91(10.54)         | 62(7.98)                             | 29(33.72)                                        |
| Previous MI                                  |             | 84(9.73)          | 57(7.34)                             | 27(31.40)                                        |
| Previous cardiac surgery                     |             | 2(0.23)           | 0(0)                                 | 2(2.33)                                          |
| CKD                                          |             | 13(1.51)          | 10(1.29)                             | 3(3.49)                                          |
| (of which known to have renal dialysis)      |             | 1(7.69)           | 0(0)                                 | 1(33.33)                                         |
| Hypertension                                 |             | 299(34.65)        | 252(32.43)                           | 47(54.65)                                        |
| Stroke                                       |             | 14(1.62)          | 13(1.67)                             | 1(1.16)                                          |
| Diabetes                                     |             | 360(41.71)        | 312(40.15)                           | 48(55.81)                                        |
| Smoking                                      |             | 293(33.95)        | 273(35.14)                           | 20(23.26)                                        |
| Beetle chewing                               |             | 10(1.16)          | 10(1.29)                             | 0(0)                                             |
| Dyslipidemia                                 |             | 186(21.55)        | 162(20.85)                           | 24(27.91)                                        |
| No comorbidities                             |             | 150(17.38)        | 142(18.28)                           | 8(9.30)                                          |
| Not Recorded                                 |             | 71                | 67                                   | 4                                                |
| <b><i>Family history</i></b>                 | 863         |                   |                                      |                                                  |
| CAD                                          |             | 170(19.70)        | 149(19.18)                           | 21(24.42)                                        |

|                                                            |     |            |            |           |
|------------------------------------------------------------|-----|------------|------------|-----------|
| CVD                                                        |     | 15(1.74)   | 14(1.80)   | 1(8.72)   |
| DM                                                         |     | 43(4.98)   | 40(5.15)   | 3(3.49)   |
| HT                                                         |     | 28(3.24)   | 24(3.09)   | 4(4.65)   |
| DVT                                                        |     | 8(0.93)    | 8(1.03)    | 0(0)      |
| None                                                       |     | 584(67.67) | 524(67.44) | 60(69.77) |
| Not Recorded                                               |     | 71         | 67         | 4         |
| <b><i>Primary cardiology intervention</i></b>              | 930 |            |            |           |
| Coronary angiogram                                         |     | 63(6.77)   | 36(4.29)   | 27(30.0)  |
| Coronary artery bypass graft                               |     | 1(0.11)    | 1(0.12)    | 0(0)      |
| Heart Failure management with vasoactive agents            |     | 12(1.29)   | 7(0.83)    | 5(5.56)   |
| Pacemaker implant                                          |     | 97(10.43)  | 47(5.60)   | 50(55.56) |
| Primary Percutaneous Coronary Intervention                 |     | 442(47.53) | 435(51.79) | 7(7.78)   |
| Rescue PCI                                                 |     | 3(0.32)    | 2(0.24)    | 1(1.11)   |
| Thrombolysis SK                                            |     | 258(27.74) | 258(30.71) | 0(0)      |
| Thrombolysis Tenecteplase                                  |     | 30(3.23)   | 30(3.57)   | 0(0)      |
| <b><i>Significant events during the inpatient stay</i></b> | 934 |            |            |           |
| CPR                                                        |     | 59(6.32)   | 55(6.52)   | 4(4.44)   |
| Defibrillation                                             |     | 80(8.57)   | 74(8.77)   | 6(6.67)   |

|                                                                 |     |              |              |              |
|-----------------------------------------------------------------|-----|--------------|--------------|--------------|
| Coronary arterial stent thrombosis                              |     | 16(1.71)     | 15(1.78)     | 1(1.11)      |
| Unplanned critical care admission                               |     | 15(1.61)     | 15(2.30)     | 0(0)         |
| Vasoactive drugs+Furosemide                                     |     | 58(6.21)     | 45(5.33)     | 13(14.44)    |
| Ventilation                                                     |     | 6(0.64)      | 6(0.71)      | 0(0)         |
| <b><i>Vasoactive drugs on admission</i></b>                     | 273 |              |              |              |
| None                                                            |     | 150(54.95)   | 142(57.49)   | 8(30.77)     |
| 1                                                               |     | 72(26.37)    | 63(23.51)    | 9(34.62)     |
| 2                                                               |     | 41(15.02)    | 33(13.36)    | 8(30.77)     |
| More than 2                                                     |     | 10(3.66)     | 9(3.64)      | 1(3.85)      |
| Not Recorded                                                    |     | 661          | 597          | 64           |
| <b>Analgesia on admission</b>                                   | 892 |              |              |              |
| Yes                                                             |     | 180(20.18)   | 164(20.07)   | 67(80.72)    |
| No                                                              |     | 712(79.82)   | 645(79.73)   | 16(19.28)    |
| Not Recorded                                                    |     | 42           | 35           | 7            |
| <b>Raised JVP on admission</b>                                  | 820 |              |              |              |
| Yes                                                             |     | 18(2.20)     | 18(2.41)     | 0            |
| No                                                              |     | 802(97.80)   | 730(97.59)   | 72(100.00)   |
| Not Recorded                                                    |     | 114          | 96           | 18           |
| Troponin I on admission (available prior to treatment decision) | 189 | 15.94(19.84) | 18.17(15.00) | 10.77(27.51) |

|                               |     |               |               |               |
|-------------------------------|-----|---------------|---------------|---------------|
| Systolic BP on admission      | 785 | 127.24[28.25] | 127.11[28.61] | 128.43[24.69] |
| Diastolic BP on admission     | 784 | 82.44[18.40]  | 82.62[18.70]  | 80.7[15.26]   |
| Heart rate on admission       | 780 | 85.22[25.17]  | 85.12[25.52]  | 86.17[21.76]  |
| Respiratory rate on admission | 881 | 25.78[16.73]  | 25.88[16.84]  | 24.79[15.69]  |
| Serum creatinine on admission | 707 | 109.05[58.30] | 109.68[59.11] | 103.54[50.60] |

### Supplementary table 2

Mode of transportation for patients presenting as a transfer from another centre and directly to the PCI facility.

| <b>Transfer from another health facility</b> | Total (666) | STEMI(616)  | NSTEMI(50) |
|----------------------------------------------|-------------|-------------|------------|
| Emergency ambulance                          | 650(97.60%) | 603(97.89%) | 47(94.0%)  |
| Hired vehicle                                | 8(1.20%)    | 7(1.14%)    | 1(2.0%)    |
| Own vehicle                                  | 7(1.05%)    | 5(0.81%)    | 2(4.0%)    |
| Public transport                             | 1(0.15)     | 1(0.16%)    | 0(0%)      |
| <b>Direct admission</b>                      | Total (224) | STEMI(192)  | NSTEMI(32) |
| Emergency ambulance                          | 16(7.14)    | 14(7.29)    | 2(6.25)    |

|                  |            |           |           |
|------------------|------------|-----------|-----------|
| Hired vehicle    | 110(49.11) | 99(51.56) | 11(34.38) |
| Own vehicle      | 94(41.96)  | 76(39.58) | 18(56.25) |
| Public transport | 4(1.79)    | 3(1.56)   | 1(3.13)   |

**Supplementary table 3. GRACE Scores**

| NSTEMI: In-hospital mortality Mean= 120.4 Permissible range= (47-212) |                  |                    |                  |                                      |
|-----------------------------------------------------------------------|------------------|--------------------|------------------|--------------------------------------|
| Risk Category                                                         | GRACE Risk Score | Number of Patients | Number of Deaths | Probability of Death In-hospital (%) |
| Low                                                                   | 1-108            | 32                 | 1                | <1                                   |
| Intermediate                                                          | 109-140          | 19                 | 1                | 1-3                                  |
| High                                                                  | 141-372          | 20                 | 3                | >3                                   |
| STEMI: In-hospital mortality Mean= 132.3 Permissible range= (49-267)  |                  |                    |                  |                                      |
| Risk Category                                                         | GRACE Risk Score | Number of Patients | Number of Deaths | Probability of Death In-hospital (%) |
| Low                                                                   | 49-125           | 176                | 2                | <2                                   |
| Intermediate                                                          | 126-154          | 229                | 8                | 2-5                                  |
| High                                                                  | 155-319          | 206                | 28               | >5                                   |

**Supplementary table 4.** Seattle angina score for patients followed to 30 days after discharge.

| <b>Seattle Angina Score</b>   | n=551           | Primary PCI n=272 |
|-------------------------------|-----------------|-------------------|
| <b>Physical limitation</b>    |                 |                   |
| mean score                    |                 |                   |
| median score                  | 84.28(SD=22.02) | 86.90(SD=18.04)   |
|                               | 91.11           | 91.11             |
| Minimal (75-100)              | 451(81.85)      | 236(86.76)        |
| Mild (50-74)                  | 61(11.07)       | 24(8.82)          |
| Moderate (25-49)              | 16(2.90)        | 5(1.84)           |
| Severe (0-24)                 | 23(4.17)        | 7(2.57)           |
| <b>Angina Stability</b>       |                 |                   |
| mean score                    | 88.31(SD=14.00) | 89.08(SD=13.07)   |
| median score                  | 92.86           | 92.86             |
| Much better (76-100)          | 479(86.93)      | 246(90.44)        |
| Slightly better (51-75)       | 58(10.53)       | 21(7.72)          |
| Unchanged (50)                | 5(0.91)         | 1(0.37)           |
| Slightly worse (25-49)        | 8(1.45)         | 3(1.10)           |
| Much worse (0-24)             | 1(0.18)         | 1(0.37)           |
| <b>Treatment satisfaction</b> |                 |                   |
| mean score                    | 75.48(SD=14.00) | 76.23(SD=13.88)   |

|                                                      |                 |                 |
|------------------------------------------------------|-----------------|-----------------|
| median score                                         | 76.47           | 76.47           |
| Completely satisfied (75-100)                        | 359(65.15)      | 179(65.81)      |
| Somewhat to mostly satisfied (50-74)                 | 158(28.68)      | 79(29.04)       |
| Somewhat dissatisfied to not satisfied at all (0-49) | 34(6.17)        | 14(5.15)        |
| <b>Quality of life EQ5-DL</b>                        |                 |                 |
| mean score                                           | 67.11(SD=22.96) | 67.03(SD=22.78) |
| median score                                         | 75              | 75              |
| Excellent (75-100)                                   | 324(58.80)      | 161(59.19)      |
| Good (50-74)                                         | 95(17.24)       | 46(16.91)       |
| Fair (25-49)                                         | 124(22.50)      | 61(22.43)       |
| Poor (0-24)                                          | 8(1.45)         | 4(1.47)         |

**Supplementary Table 5: Domain 3**

| <b>Quality indicators</b>                                                                                                                                                                                                              | <b>Total<br/>Population</b> | <b>Eligible<br/>population</b> | <b>Availability<br/>(%)</b> | <b>Compliance<br/>(%) SE</b>    |
|----------------------------------------------------------------------------------------------------------------------------------------------------------------------------------------------------------------------------------------|-----------------------------|--------------------------------|-----------------------------|---------------------------------|
| <b>In hospital risk assessment in the NSTEMI population</b><br>QI 3.1.The proportion of patients with NSTEMI who have ischemic risk assessment using the GRACE risk score<br>Actual mortality<br>Mean probability of death In-hospital | 90                          | 90                             | 90(100%)                    | 71(78.89)0.04<br><br>7%<br>1-3% |
